Files removed following a technical error

bioRxiv

This manuscript was removed because it posted owing to a technical error
